# 1 Detecting RyR clusters with 2 CaCLEAN: influence of spatial 3 distribution and structural 4 heterogeneity

5 David Ladd<sup>1,2,6</sup>, Agne Tilunaite<sup>3</sup>, Christian Soeller<sup>4</sup>, H. Llewelyn Roderick<sup>5</sup>,  
6 Edmund Crampin<sup>1,2,3</sup>, Vijay Rajagopal<sup>6</sup>

\*For correspondence:

[vijay.rajagopal@unimelb.edu.au](mailto:vijay.rajagopal@unimelb.edu.au)

Present address: <sup>5</sup>The University  
of Melbourne, Parkville VIC 3010  
Australia

7 <sup>1</sup>Systems Biology Lab, Department of Biomedical Engineering, University of Melbourne,  
8 Australia; <sup>2</sup>ARC Centre of Excellence in Convergent Bio-Nano Science and Technology,  
9 School of Chemical and Biomedical Engineering, University of Melbourne, Australia;  
10 <sup>3</sup>Systems Biology Lab, School of Mathematics and Statistics, University of Melbourne,  
11 Australia; <sup>4</sup>Living Systems Institute, University of Exeter, United Kingdom; <sup>5</sup>Laboratory of  
12 Experimental Cardiology, Department of Cardiovascular Sciences, KU Leuven, Belgium;  
13 <sup>6</sup>Cell Structure and Mechanobiology Group, Department of Biomedical Engineering,  
14 University of Melbourne, Australia

---

16 **Abstract** In cardiomyocytes, coordinated calcium release from intracellular stores through  
17 ryanodine receptor (RyR) clusters is key to contraction. Recently, a deconvolution algorithm  
18 (CaCLEAN) was proposed to detect the functional response of RyR clusters from confocal imaging  
19 of live cells. However, CaCLEAN cluster detection remained unvalidated without ground truth  
20 values. We developed a structurally realistic computational model of calcium emanating from RyR  
21 clusters in a rat ventricular cardiomyocyte during the first 30 ms of the calcium transient. The  
22 effects of RyR cluster density and mitochondria acting as diffusion barriers were examined.  
23 Confocal microscopy images were simulated and analysed using CaCLEAN. CaCLEAN detection  
24 accuracy was more sensitive to RyR cluster density than the presence of mitochondria. Detection  
25 recall and precision varied between 0.69 and 0.82 in densely and sparsely-packed RyR cluster  
26 distribution cases, respectively. This sensitivity to cluster packing also affected the distance from  
27 the imaging plane clusters were detected.

---

## 29 Introduction

30 Each heartbeat is induced by a flood of calcium (Ca<sup>2+</sup>) from the sarcoplasmic reticulum (SR), into  
31 the cytosol. This release of Ca<sup>2+</sup> through clusters of ryanodine receptors (RyRs) raises the bulk  
32 cytosolic Ca<sup>2+</sup> concentration from 0.1  $\mu$ M to  $\approx$ 1  $\mu$ M within 30 ms and results in exposing of cross-  
33 bridge binding sites on the actin filaments, facilitating the cellular contractions that compose a  
34 heartbeat (*Bers, 2002*). Confocal (*Soeller and Cannell, 2002*) and super-resolution (*Hou et al., 2015*)  
35 microscopy imaging of immuno-labelled cardiac tissue preparations has previously revealed the  
36 spatial organisation of RyR clusters, but measurements from fixed tissues are limited in their ability  
37 to provide insights into function.

38 *Tian et al. (2017)* recently proposed an adaption of the CLEAN method from radio astronomy  
39 (*Högbom, 1974*) to detect Ca<sup>2+</sup> release sites from fluorescence confocal imaging of live cardiomy-  
40 cytes. Using this algorithm (CaCLEAN) the authors demonstrated the possibility of detecting the  
41 time-dependent functional response of RyR clusters in live cell preparations using widely available  
42 experimental methods. Further, if proven in this context, similar methods may extend to other  
43 cellular processes that can be approximated as an impulse response of a collection of point sources  
44 in a fluorescence microscopy signal.

45 Several questions remain however regarding the suitability and performance of CaCLEAN. In  
46 their original article, *Tian et al. (2017)* state that based on analysis of Ca<sup>2+</sup> transients with varying  
47 distance and convolved noise, CaCLEAN is able to resolve local transients with centres 1  $\mu\text{m}$  apart.  
48 The authors deem a 1  $\mu\text{m}$  minimum cluster spacing reasonable on the basis that the mean distance  
49 between RyR clusters was previously reported as 1.02  $\mu\text{m}$  (*Soeller et al., 2007*). However, the  
50 cited measurement combines clusters within the same z-disk and those spanning separate z-disks.  
51 Clusters within a given z-disk are more closely packed, as apparent from the 0.66  $\mu\text{m}$  nearest  
52 neighbour distance reported in the same study (*Soeller et al., 2007*). In the longitudinal orientation  
53 typical of experimental preparations of cardiomyocytes (as simulated below in *Figure 3A*), this  
54 results in the presence of inter-cluster spacings below 1  $\mu\text{m}$  in the imaging plane (i.e., along the  
55 y-axis of each z-disk in *Figure 3A*) and in the through-imaging-plane depth.

56 Further complicating detection is that, compared to the near-vacuum between astronomical ob-  
57 jects, the diffusive volume between clusters of RyRs in cardiomyocytes is heterogeneous, consisting  
58 primarily of myofibrils and mitochondria. This is relevant to the local distribution of diffusing Ca<sup>2+</sup>:  
59 while homologues of cell membrane Ca<sup>2+</sup> transport channels exist on mitochondria and exhibit a  
60 modest buffering effect, Ca<sup>2+</sup> flux between the cytosol and intra-mitochondrial space is negligible  
61 compared to other cytosolic Ca<sup>2+</sup> pathways under physiological conditions (*Williams et al., 2013*).  
62 Given this potential barrier-like effect of mitochondria to diffusing Ca<sup>2+</sup>, we hypothesized that Ca<sup>2+</sup>  
63 reflecting against mitochondria could impact the detection performance of CaCLEAN.

64 In order to test the performance of CaCLEAN, we developed a spatially detailed computational  
65 model of an eight-sarcomere section of a cardiomyocyte, which we used to simulate reaction-  
66 diffusion of Ca<sup>2+</sup> emanating from RyR clusters during the rising phase (first 30 ms) of the Ca<sup>2+</sup>  
67 transient. Fluorescence microscopy data was simulated from this model and analysed with CaCLEAN.  
68 This allowed for the establishment of ground truth values for RyR cluster firing locations and  
69 assessment of performance in terms of true positives (hits), false negatives (misses), and false  
70 positives (algorithmic artefacts).

71 Our findings indicate that the presence of mitochondria only marginally impacts the perfor-  
72 mance of CaCLEAN. However, inter-cluster spacing has a significant impact on detection perfor-  
73 mance and on how far from the imaging plane clusters are most accurately detected. We estimate  
74 the accuracy and precision of the algorithm as between 69-82%, depending on the density of cluster  
75 locations and their distance from the imaging plane. Our analysis therefore serves as a reference  
76 for future applications of this algorithm, providing quantitative analysis of performance using a  
77 physics-based modelling framework with known ground truths.

## 78 Results

### 79 Simulating microscopy data allows for assessment of detection performance with 80 known ground truth values

81 A spatially detailed finite element (FE) computational model of an eight sarcomere section of a  
82 cardiomyocyte was constructed to test the performance of CaCLEAN in detecting RyR clusters. The  
83 algorithms used to generate the model (*Rajagopal et al., 2015*) enable the creation of models with  
84 different RyR cluster distributions. The influence of mitochondria and the spatial arrangement of  
85 RyR clusters on the performance of CaCLEAN were studied using these models. This resulted in  
86 four model permutations:

- 87 1. CASE 1 (high cluster density, no mitochondria): A case with high cluster density (N=984, 123  
88 clusters per z-disk) based on statistical analysis of nearest neighbour distributions of clusters  
89 from immuno-labelled confocal microscopy data (*Figure 1B*).
- 90 2. CASE 2 (low cluster density, no mitochondria): A case with a relatively lower cluster density  
91 (N=408 or 51 per z-disk) and an additional constraint of a minimum spacing of 1  $\mu\text{m}$  spacing  
92 between cluster centers.
- 93 3. CASE 3 (high cluster density, with mitochondria): Mitochondrial regions (*Figure 1C*) were  
94 included within the computational model, acting as diffusion barriers. RyR cluster distributions  
95 were defined as in case 1.
- 96 4. CASE 4 (low cluster density, with mitochondria): Mitochondrial regions were included; RyR  
97 cluster distributions were defined as in case 2.

98 In the three-dimensional FE model, the fluorescence-bound  $\text{Ca}^{2+}$  (FCa) field at a given point was  
99 determined by the time-dependent reaction-diffusion from the surrounding cluster sources (see  
100 *Figure 1E*). The FCa field was then interpolated onto a regular grid (see *Figure 2A*) and temporally  
101 downsampled to 5 ms intervals. The FCa field was then convolved in three dimensions with a point  
102 spread function (PSF, *Figure 2B*) to simulate optical blurring and light noise (SNR=100) was added.  
103 This dataset was then resampled at 215 nm resolution in two dimensions at 22 equidistant slices as  
104 indicated in *Figure 2C* to obtain simulated images that mimic fast 2D confocal images obtained in  
105 typical experiments.

106 The resulting time-dependent, simulated confocal fluorescence microscopy images at each  
107 slice (*Figure 3A*) were then analysed with CaCLEAN to produce maps (*Figure 3B*), which were then  
108 segmented into individual clusters (*Figure 3C*). To measure algorithm performance we conducted a  
109 statistical classification (*Figure 3D*) using the modeled locations as the actual class (ground truths)  
110 and the detected locations as the predicted class to identify true positives (TP), false negatives (FN),  
111 and false positives (FP). TP (ground truth) represented the modeled clusters in a given admissible  
112 window. TP (detected) represented the TP (ground truth) correctly identified by CaCLEAN. FN  
113 identified the TP (ground truth) "missed" by CaCLEAN TP (detected). FP represented the cluster  
114 locations identified by CaCLEAN that were not TP (ground truth).

### 115 **Cluster distance from the imaging plane reveals the trade-off between recall and** 116 **precision**

117 For each simulated imaging plane, modeled RyR clusters were considered TP (ground truth) if their  
118 centers were within a distance threshold from the imaging plane we referred to as the 'admissible  
119 window' (see *Figure 4*). As illustrated in *Figure 4A*, the number of TP (ground truth, magenta)  
120 increased linearly with the admissible window as the window incorporated more of the modeled  
121 cluster locations. The number of TP (detected, green) events approached a limit as the collapsed  
122 two-dimensional imaging space became saturated with available TP (ground truth) locations and  
123 the signal diffusing from far-field clusters did not reach the image space.

124 Clusters located very near the z-depth<sup>1</sup> of the imaging plane were the most likely to affect  
125 the signal and be detected by the algorithm, as indicated by the consistently low FN (blue) at low  
126 admissible window. However, with a very narrow admissible window, FP (red) were prevalent since  
127 clusters located just outside of this arbitrary tolerance still diffused into the imaged space and were  
128 detected by CaCLEAN. Conversely, with a widening definition of the admissible window, FP dropped  
129 and FN increased due to the asymptotic behaviour of TP (detected).

130 Recall and precision were evaluated for the four model permutations (see *Figure 5*). Recall, as  
131 the ratio of TP (detected) to TP (ground truth), provided fractional measure of correctly identified  
132 clusters. Precision, as the ratio of the number of TP (detected) to all detected sites (TP and  
133 FP), provided the fraction of detected clusters that were not FP. Higher values indicate better  
134 performance in both measures. Precision appeared to asymptotically approach 1 in all cases except

<sup>1</sup>Where the two-dimensional simulated image plane represented x-y axes.

135 the densely-packed with mitochondrial barriers case (case 3), where additional false positive events  
136 resulted in a slight drop to 0.95.

### 137 **Inter-cluster spacing has a greater impact on CaCLEAN performance than mito-** 138 **chondrial diffusion barriers**

139 The intersection of the recall and precision curves identifies the admissible window at which the  
140 number of false positives is equivalent to the number of false negatives (and therefore the 'correct'  
141 number of clusters is still predicted). While there may be applications where optimising for recall  
142 or precision may be more appropriate, this intersection point was chosen a useful indicator of  
143 general performance. The intersection point values are indicated by the dashed lines in *Figure 5* and  
144 *Figure 6*. Without mitochondria, in the low cluster density case recall =  $0.83 \pm 0.049$  and precision  
145 =  $0.83 \pm 0.075$  at an admissible window of 640 nm; in the high cluster density case recall =  $0.70 \pm$   
146  $0.079$  and precision =  $0.70 \pm 0.112$  at an admissible window of 270 nm.

147 Inter-cluster spacing was found to have a greater impact on the performance of CaCLEAN than  
148 the presence of mitochondria. With mitochondria acting as barriers to diffusion, in the low cluster  
149 density case recall =  $0.82 \pm 0.059$  and precision =  $0.82 \pm 0.073$  at an admissible window of 610 nm;  
150 in the high cluster density case recall =  $0.69 \pm 0.079$  and precision =  $0.69 \pm 0.091$  at an admissible  
151 window of 280 nm. Mean recall and precision values for each model permutation (solid lines in  
152 *Figure 5*) were further analysed to produce precision-recall curves (see *Figure 6*).

153 Finally, we evaluated the fraction of clusters detected by CaCLEAN as a function of z-distance  
154 from the focal imaging plane to identify how detection of clusters decayed with distance from the  
155 imaging plane (see *Figure 7*). This analysis again highlighted the effect of inter-cluster spacing:  
156 when using Ca-clean to detect sites in models with a high density of release sites the effective  
157 z-response of detection falls much more steeply than when a low density of true release sites was  
158 simulated.

## 159 **Discussion**

160 We developed a computational model of the complex environment of Ca<sup>2+</sup> diffusing into the  
161 intracellular space of a cardiomyocyte. Processing the reaction-diffusion model results to simulate  
162 confocal fluorescence microscopy data allowed for quantitative assessment of the performance of  
163 detection of Ca<sup>2+</sup> release sites with CaCLEAN against known ground truth values in the context  
164 of realistic cellular physics. Statistical classification identified true positives, false positives, and  
165 false negatives<sup>2</sup>; enabling analysis in terms of recall (sensitivity, hit rate, or true positive rate) and  
166 precision (positive predictive value).

167 A key variable in the performance analysis was the definition of which modeled clusters were  
168 considered ground truths in the statistical classification at each imaging plane. We introduced the  
169 'admissible window' variable for admitting clusters as ground truth values based on the through-  
170 imaging-plane distance of cluster centers from the imaging plane, as illustrated in *Figure 4*. Param-  
171 eterising algorithmic performance in terms of the admissible window provided a more complete  
172 picture of which clusters CaCLEAN was likely to detect and highlighted the inherent trade-off  
173 between precision and recall.

174 The admissible window is also of practical interest to those applying CaCLEAN to their data. This  
175 parameter can be used as an indicator of the maximum relevant depth of clusters detected by the  
176 algorithm in the image. As evident in *Figure 5*, interpretation of this depth is strongly dependent  
177 on a user's performance requirements and the density of clusters in the sample. A user seeking  
178 to determine maximum relevant depth should first determine whether they are more willing to  
179 sacrifice precision or recall, deciding whether misses or false positives are of greater concern in  
180 their application. We suggest the 'intersection point' as a general default performance measure:

<sup>2</sup>True negatives were not considered in this application, as they would represent the set of all remaining locations that were neither modeled nor detected.



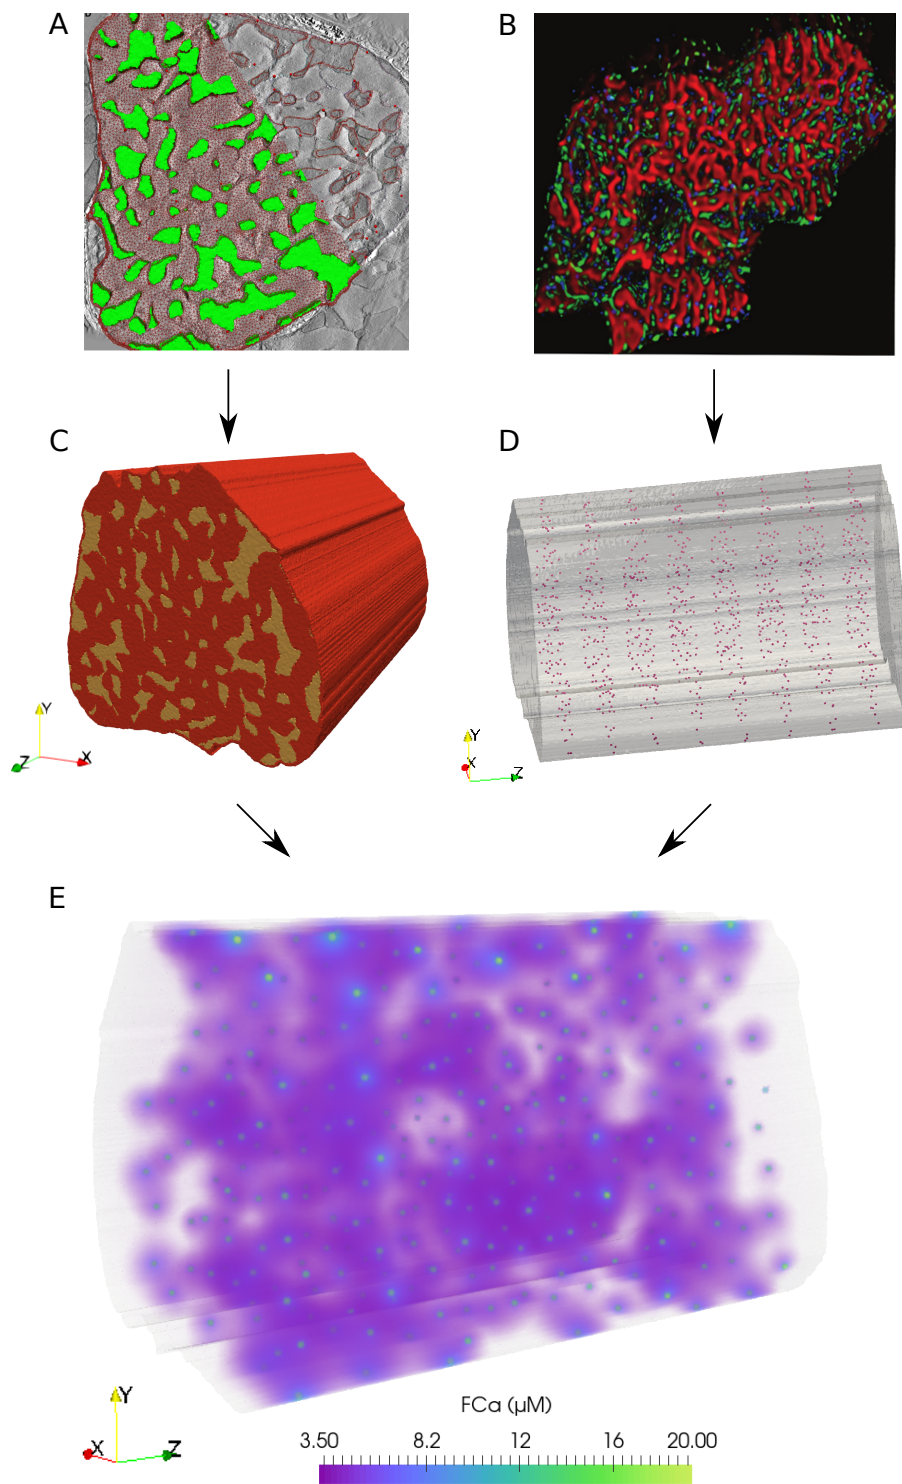

**Figure 1. Finite element model of Ca<sup>2+</sup> reaction-diffusion in an eight-sarcomere section of a cardiomyocyte.** (A) From an electron tomography imaging stack, myofibril and mitochondria (highlighted in green) regions were segmented from a slice at the depth of a z-disk. (C) This geometry was extruded 16 μm (in the direction shown as z here) to create a three-dimensional eight-sarcomere model. Mitochondrial regions shown in yellow; red volume indicates the myofibrillar and cytosolic region. (B) Statistical analysis of immuno-labelled microscopy data (RyR clusters shown in green) was used to determine inter-cluster spacing distributions. (D) RyR cluster locations in the model were defined at mitochondrial and myofibrillar border regions based on statistical spacing distributions. (E) A reaction-diffusion finite element model simulates the release of Ca<sup>2+</sup> from the RyR clusters during the rising phase (first 30ms) of the Ca<sup>2+</sup> transient. Volume rendering of the fluorescence-bound Ca<sup>2+</sup> (FCa) field shown at t = 15ms.

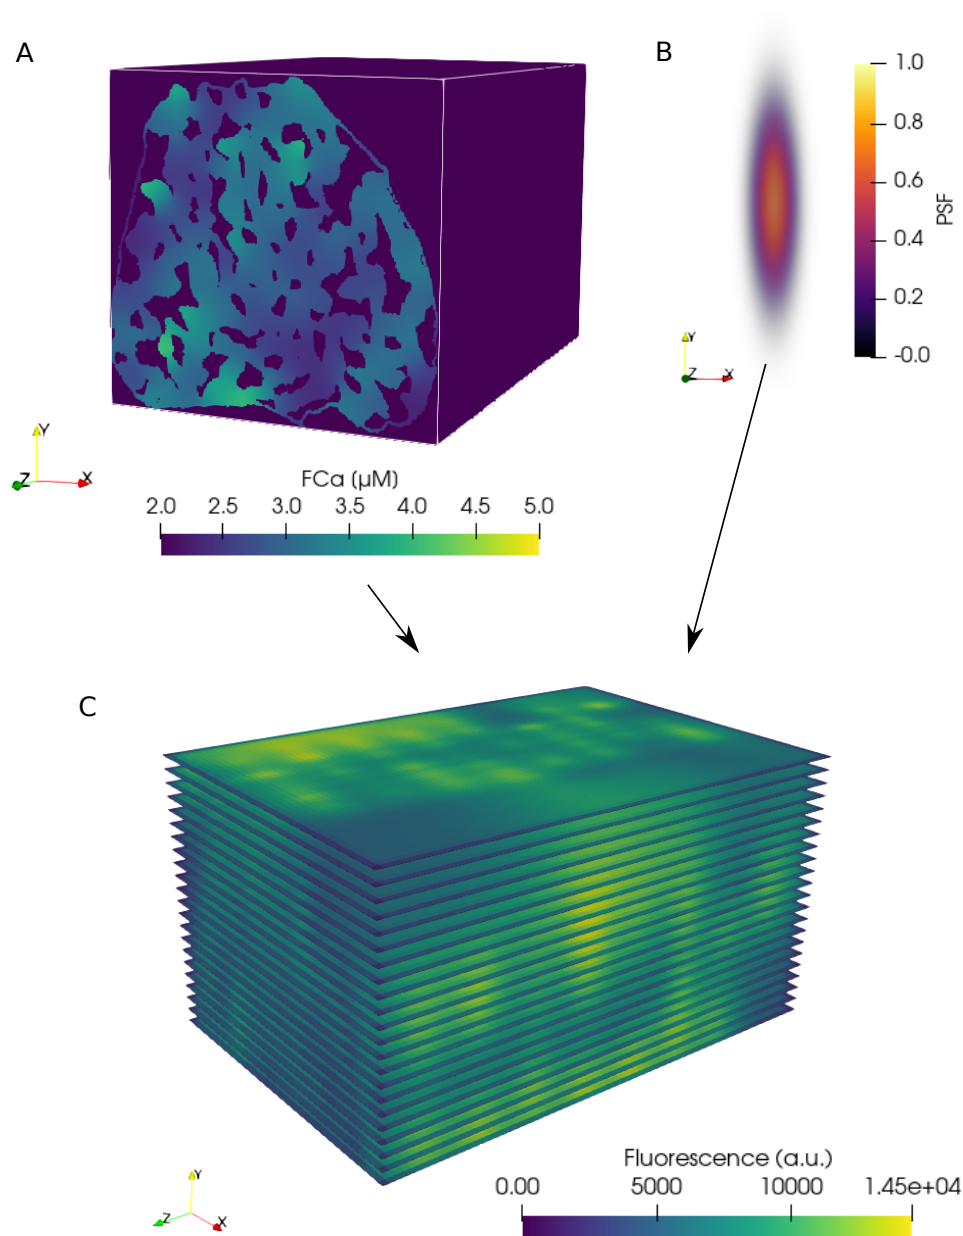

**Figure 2. Simulation of confocal fluorescence microscopy images from FE model results.** (A) FE FCa field data (see *Figure 1E*) interpolated onto a regular grid with 53.75 nm resolution in each coordinate direction. Three-dimensional convolution of the interpolated FCa data with a (B) point spread function (PSF) produces blurring typical of confocal fluorescence microscopy data. (C) Blurred data resampled at a pixel resolution of 215 nm within the 22 simulated two-dimensional imaging planes in the volume. A and C are shown at a single time point,  $t = 15$  ms.

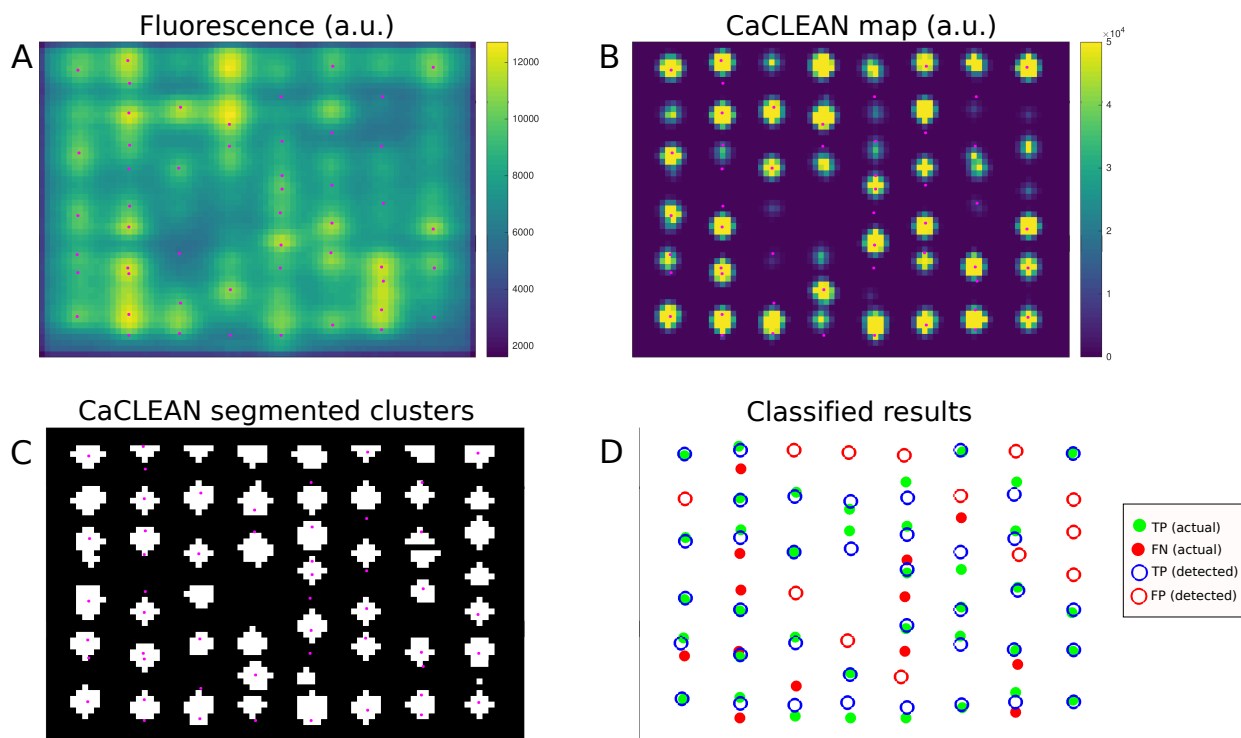

**Figure 3. Example of CaCLEAN detection and classification against modeled locations.** (A) Simulated confocal fluorescence microscopy image at  $t=15$  ms for the densely packed cluster case ( $N=123$  per z-disk) with mitochondria. This represents one slice from the middle of the stack shown in *Figure 2C*. Modeled RyR cluster center locations within 280 nm of the imaging plane shown in magenta (also in B and C). (B) CaCLEAN map of the fluorescence signal. (C) Segmented clusters detected by CaCLEAN. (D) Statistical classification of detected cluster locations versus actual (ground truth) modeled locations. In this case recall = 0.68 and precision = 0.68, representing an ‘intersection point’ admissible window, as described further below.

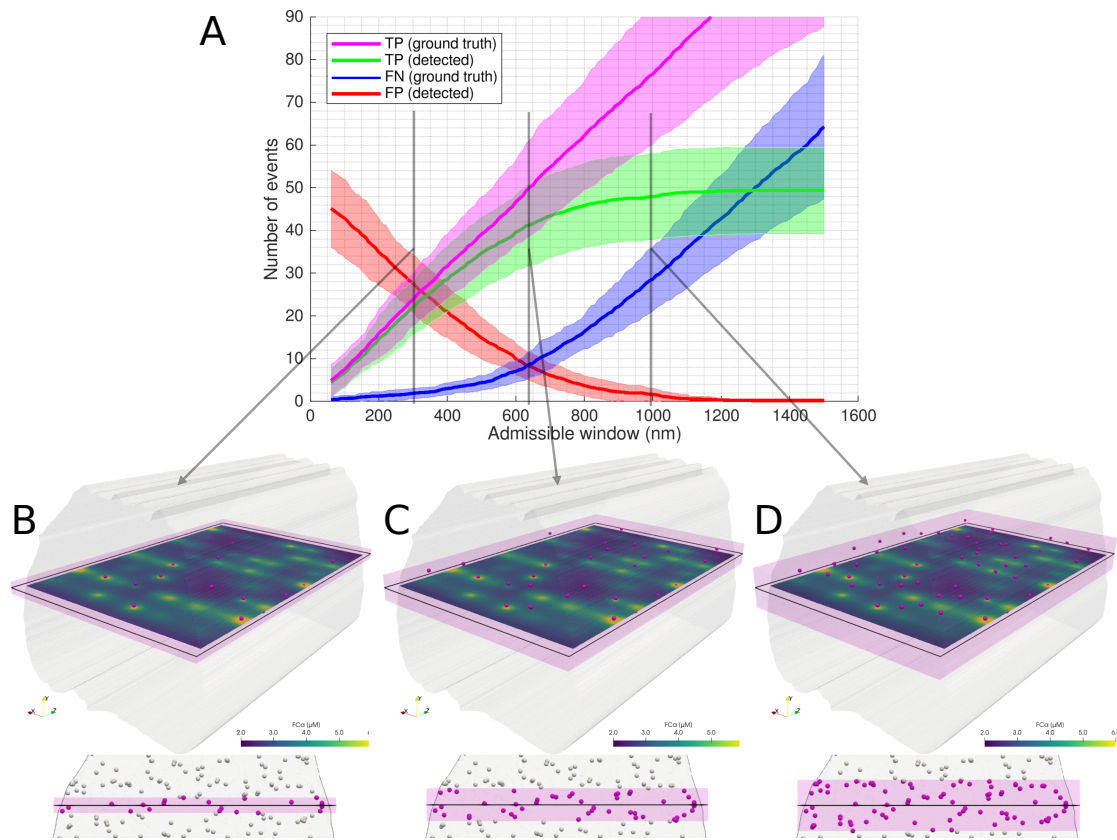

**Figure 4. Illustration of the admissible window parameter.** The admissible window defines the distance tolerance from the simulated imaging plane RyR cluster centers may be to be considered ground true positives. (A) Statistical classifier CaCLEAN results as a function of the admissible window for low cluster density, no mitochondrial barriers (case 2). 22 images were simulated with equidistant spacing through the model volume. Solid lines represent mean values and shaded regions indicate one standard deviation of values. In (B), (C), and (D) an example image slice is shown, with clusters considered ground TPs at admissible windows of (B) 300 nm, (C) 640 nm, and (D) 1000 nm in magenta. An oblique view is shown above, along with FCa model results at  $t = 15$  ms. Below, an axial view perpendicular to the imaging plane is shown (looking through the modeled volume, with clusters outside the admissible window shown in white). The admissible window is indicated in pink shading.

**Figure 4-Figure supplement 1.** Statistical classifiers of CaCLEAN performance in four model permutations

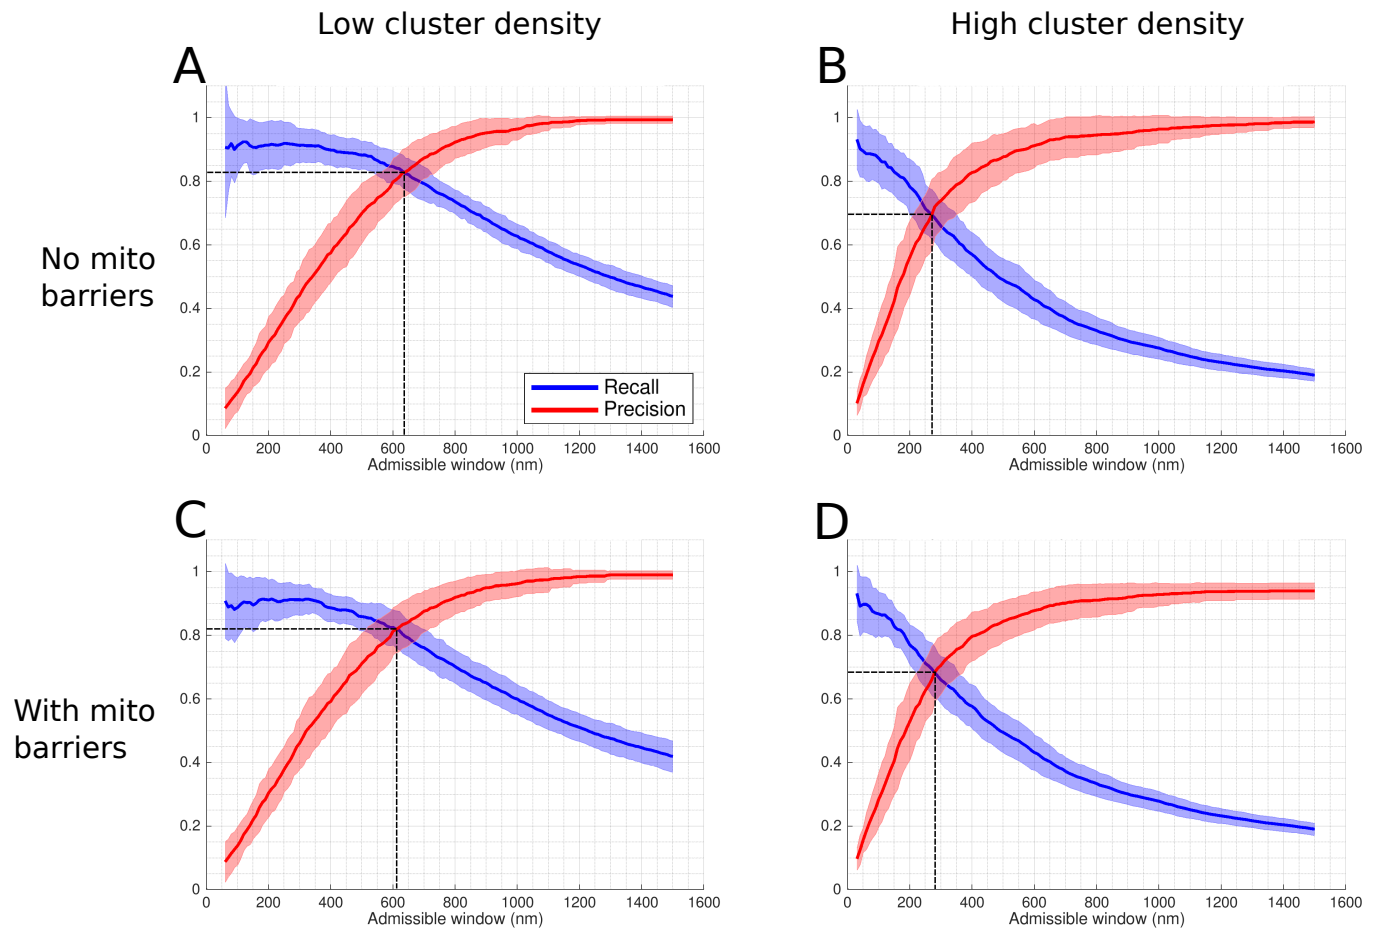

**Figure 5. Recall and precision of CaCLEAN applied to simulated microscopy data.** Recall and precision evaluated based on classification results. Shaded regions indicate one standard deviation of recall and precision values. (A) A minimum spacing of  $1 \mu\text{m}$  is enforced between modeled clusters, no mitochondria present in the volume (resulting in a continuous domain across the mitochondrial regions). (B) Cluster spacing is determined by statistical analysis of RyR cluster distributions from immuno-labelled super-resolution microscopy data, no mitochondria present in the volume. (C) A minimum cluster spacing of  $1 \mu\text{m}$  is enforced between modeled clusters, mitochondrial regions are subtracted from the volume, acting as barriers to diffusion. (D) Cluster spacing is determined by statistical analysis of RyR cluster distributions from immuno-labelled super-resolution microscopy data, mitochondrial regions are subtracted from the volume, acting as barriers to diffusion. Dashed black lines used to indicate values at 'intersection points', where recall = precision.

**Figure 5-Figure supplement 1.** Recall and precision with alternative PSFs

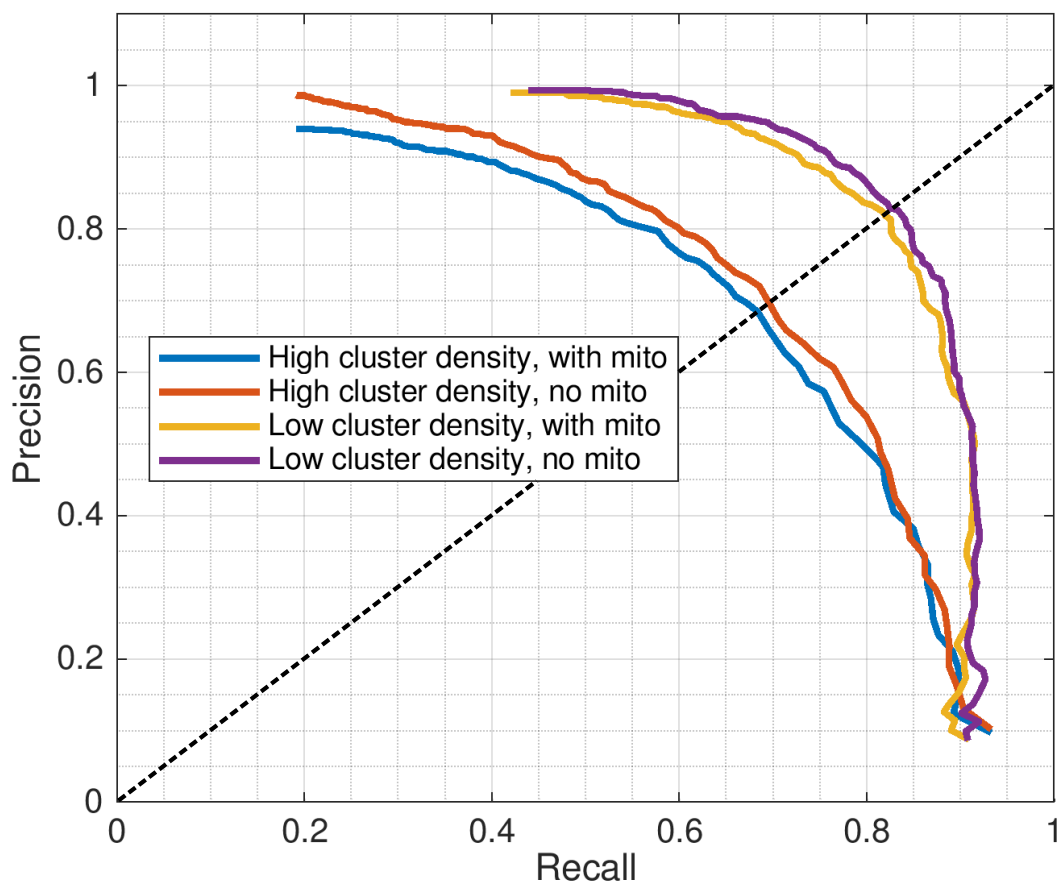

**Figure 6. Precision-recall curve for CaCLEAN in four models.** Recall and precision mean values from results shown in *Figure 5* plotted as a precision-recall curve. Higher values indicate better performance in each axis. Dashed line indicates intersection point, where recall = precision.



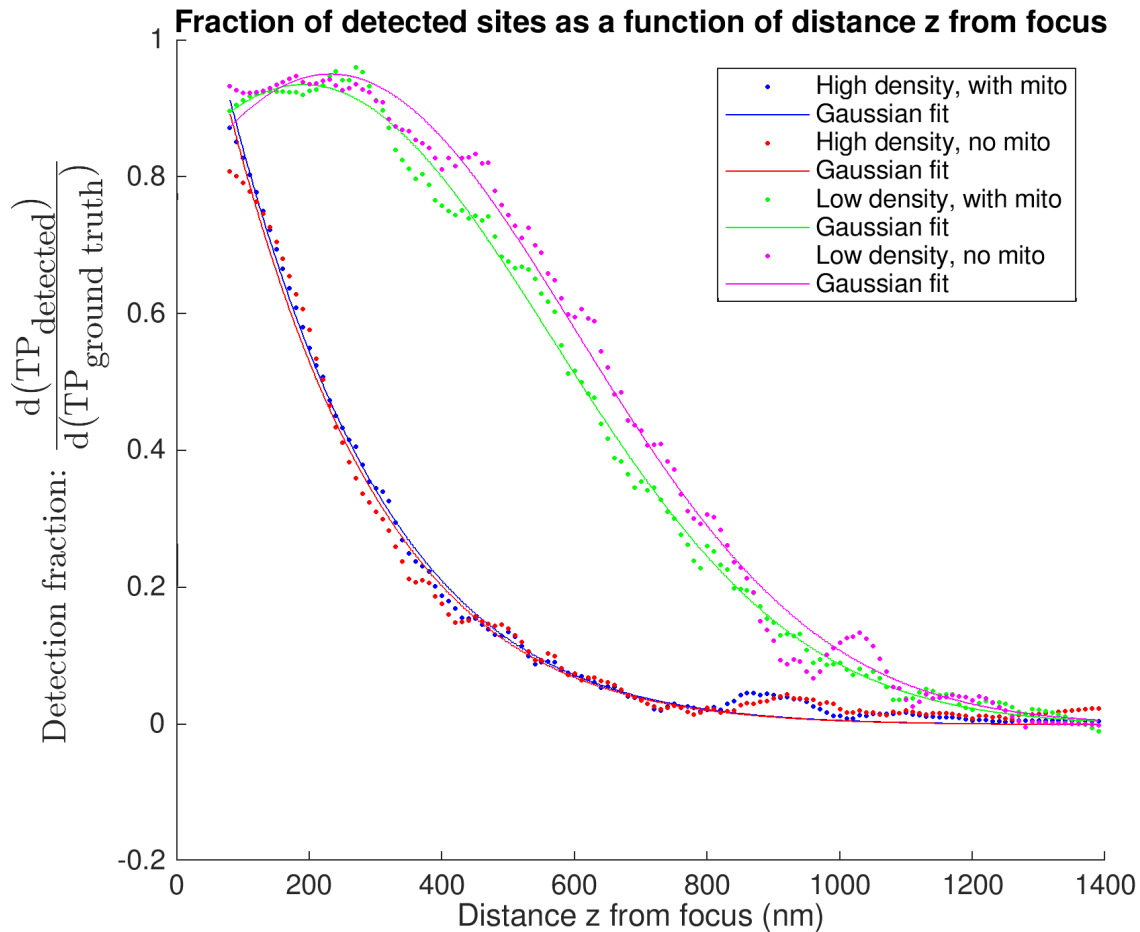

**Figure 7. "Differential recall": axial dependence of detection of true positive sites.** Each curve shows the fraction of detected sites as a function of the distance  $z$  from the nominal focal plane. The data at focal distance  $z$  is shown as a fraction of all sites within 5 nm of that  $z$  depth i.e. within a 10 nm band centered about the distance  $z$  above and below the focal plane. A value of 1 is equivalent to the detection of all sites at a given  $z$ -depth. The various curves are calculated for different models, having a high or low density of sites and either using homogenous diffusion ("no mito") or obstacles to diffusion wherever mitochondria are ("with mito"). Data points shown are the result of applying a smoothing filter (see [Figure Supplement 1](#) for the low density, no mito case shown in magenta). Solid lines indicate single-term Gaussian fits to the filtered data.

**Figure 7-Figure supplement 1.** Smoothing filter applied to detection fraction data

181 this identifies the depth where precision is equal to recall and the number of false positives is equal  
182 to the number of false negatives (thus still detecting approximately the correct number of clusters).  
183 For example, if a user is confident that clusters in a sample are likely at least 1  $\mu\text{m}$  apart and is  
184 satisfied with correctly identifying at least 80% of the clusters that exist, the maximal relevant depth  
185 would be  $\approx 610$  nm based on **Figure 5C**. From the recall curve, the same user may also be interested  
186 to find the algorithm will likely correctly identify 90% of all clusters within 350 nm of the imaging  
187 plane. The recall curves in **Figure 5** therefore also communicate how the detection performance for  
188 an active cluster population drops as further away clusters are considered ground truths.

189 The shape of the point spread function (PSF, see **Figure 2B**) weights the interpolation and blurring  
190 of the three-dimensional data into a two-dimensional image at each time step. Choice of PSF impacts  
191 the fidelity of the data interpolation into the image and, subsequently, CaCLEAN's performance  
192 on the interpolated data. However, it should be noted that the optical depth of the PSF does not  
193 directly influence how far from the image clusters may be located or detected. CaCLEAN detection  
194 operates on the fluorescence signal emitted by  $\text{Ca}^{2+}$  released from RyR clusters, rather than directly  
195 capturing these sites in the optical depth of the microscope. **Figure Supplement 1** shows the recall  
196 and precision values using PSFs with half and double the full width at half maximum dimensions of  
197 our baseline settings. A tighter PSF produces less blurring and slightly better performance in both  
198 precision and recall, while a broad PSF produces excessive blurring and a drop in performance but  
199 general trends remain similar.

200 In addition to distance from the imaging plane, further factors complicate whether the signal  
201 from a given cluster will reach the imaging plane and whether it is detectable by CaCLEAN in both  
202 our model and actual experimental data. Individual cluster firing time and strength variability biases  
203 detection of early and stronger events. CaCLEAN produces some false positives as algorithmic  
204 artefacts. Proximity to other clusters can cause signals to merge or cover each other- especially with  
205 increased cluster density. For instance, two separate clusters the same z-distance above and below  
206 the imaging plane but at the same x-y location in the imaging plane can only register as a single site  
207 in the imaged space. This identifies an inherent drawback resulting from using two-dimensional  
208 images as a basis for describing a three-dimensional system.

209 We investigated the impact of cluster spacing on CaCLEAN detection performance by analysing  
210 two cluster distribution types. In the 'high cluster density' case, cluster locations at each z-disk  
211 were defined based on statistical analysis of cluster distributions from immuno-labelled confocal  
212 images and applied to admissible locations bordering mitochondria and myofibrils segmented from  
213 electron tomography data (*Rajagopal et al., 2015*). This simulated a case where all RyR clusters  
214 detectable by immuno-labelling<sup>3</sup> fired during the 30 ms period modeled. This was considered a  
215 reasonable high bound on cluster distribution density since it is unlikely that all clusters identifiable  
216 by immuno-labelling would fire for a single excitation cycle under normal physiological conditions.  
217 *Tian et al. (2017)* used CaCLEAN to estimate cluster re-fire rates of  $\approx 62.8\%$  in mouse atrial myocytes,  
218 with only  $\approx 10\%$  of clusters always firing. However, the authors also showed that beta-adrenergic  
219 stimulation can increase recruitment of firing clusters, reporting increases in detected cluster  
220 density of  $\approx 30\%$  in rat ventricular myocytes<sup>4</sup>. In our 'low cluster density' case, distributions of  
221 clusters were similarly generated based on realistic locations of RyR clusters but with an additional  
222 constraint of a minimum spacing of 1  $\mu\text{m}$  between all clusters within a given z-disk. The number  
223 of clusters in this case was also reduced to comply with this constraint, with the total number of  
224 clusters 41% of those of the high density case. This was chosen as representative of a lower bound  
225 on cluster recruitment (as might occur with high pacing frequency) but also revealed the impact of  
226 a 1  $\mu\text{m}$  minimum cluster spacing requirement on detection.

227 RyR cluster distribution spacing varies across species, with nearest-neighbour spacings reported  
228 as  $0.66 \pm 0.06 \mu\text{m}$  in rat and  $0.78 \pm 0.07 \mu\text{m}$  in human (*Soeller et al., 2007*). Clusters located in the

<sup>3</sup>Immuno-labelled confocal data populations may still slightly underestimate cluster density owing to diffraction-limited resolution.

<sup>4</sup>See Figure 3Cb in *Tian et al. (2017)*

229 periphery of mouse myocytes are more irregularly spaced than those located in the cell interior  
230 (*Hiess et al., 2018*). These distributions also alter during development, with RyR clusters in rabbits  
231 changing from majority peripheral clusters with  $\approx 0.7 \mu\text{m}$  spacing in neonates to majority interior  
232 clusters with  $\approx 2 \mu\text{m}$  regular spacings between z-disks (*Dan et al., 2007*). In addition to spatial  
233 locations of RyR protein clusters, another consideration is functional response of clusters; an area  
234 where CaCLEAN shows unique promise. *Tian et al. (2017)* used the algorithm to explore how firing  
235 reliability decreases with increased stimulation frequency and how firing reliability increases under  
236 beta-adrenergic stimulation.

237 In our analysis, cluster spacing had a significant impact on both the performance of CaCLEAN  
238 and the admissible window size at which the algorithm performed best. At the intersection point of  
239 the 'with mitochondria' cases, detection recall and precision were 0.82 at 610 nm in the low cluster  
240 density case versus 0.69 at 280 nm in the high cluster density case. In contrast, for the low cluster  
241 density results at the high cluster density intersection point admissible window of 280 nm, precision  
242 = 0.43 indicating more false positives than true positives.

243 Analysis of performance in terms of the admissible window provides a basis for assessing  
244 "cumulative recall", i.e., the detection of all clusters within a given tolerance of the focal plane. We  
245 also evaluate "differential recall" in *Figure 7*, i.e., the detection fraction of clusters at distance  $z$  from  
246 the imaging plane. This communicates how the detection fraction of individual clusters drops with  
247 distance from the focal plane and again emphasizes the importance of cluster density: detection  
248 falls much more steeply in the high density cases. In other words, depending on how many sites are  
249 active the  $z$ -response of CaCLEAN changes. In experiments this means that in cases where all sites  
250 release, e.g. after stimulation with with a drug such as isoprenaline, the sites reported by CaCLEAN  
251 are on average from regions closer to the focus than when recording in conditions of partial block  
252 where fewer sites are available.

253 For useful detection performance, it is therefore important to consider the likely density of the  
254 events being detected in order to determine how far from the imaging plane such events are likely  
255 located. Those interested in using CaCLEAN to reconstruct three-dimensional maps of clusters  
256 should also be aware of how far from the imaging plane detected clusters are likely to be when  
257 choosing a slicing depth for reconstruction.

258 The presence of heterogeneous diffusion (in the form of mitochondrial obstacles) in the inves-  
259 tigated models was found to have a marginal but consistent negative impact on both recall and  
260 precision in CaCLEAN. This was most pronounced in the high cluster density case, as evident from  
261 the precision-recall analysis (*Figure 6*). We hypothesize that structural heterogeneity due to the  
262 presence of subcellular structures (e.g., mitochondria, nucleus, transverse tubules, z-disks, etc.) is  
263 unlikely to have a major impact on detection of point sources using CaCLEAN or related algorithms  
264 under the imaging resolution conditions simulated here.

265 The results presented in this work (particularly *Figure 5*, *Figure 6*, and *Figure 7*) are provided as a  
266 reference tool for potential users of CaCLEAN. The model and the simulated imaging data produced  
267 by it could also serve as a testing and validation platform for further improving CaCLEAN or other  
268 approaches seeking to identify RyR clusters by serving as a training set for improved detection or  
269 segmentation. Finally, this study highlights how computational methods may be used to establish  
270 ground truth values that may not otherwise be experimentally available.

## 271 **Materials and methods**

### 272 **Finite element model of reaction-diffusion in a half-sarcomere**

273 The reaction-diffusion finite element (FE) model here builds on a previous FE model of a half-  
274 sarcomere (*Rajagopal et al., 2015*). From electron tomography (ET) images of adult rat ventricular  
275 myocytes, a three-dimensional axial region with a thickness of approximately  $0.875 \mu\text{m}$  was seg-  
276 mented. This region represented approximately half of a single sarcomere, with the z-disk a plane  
277 through the center of the thickness of the domain. The region was approximately  $11 \mu\text{m}$  in diameter,

278 varying with the segmented surface.

279 From this half-sarcomere image stack, the central slice representing the level of the z-disk was  
280 extracted and regions representing myofibrils and mitochondria were manually segmented. This  
281 two-dimensional slice was then extruded 16  $\mu\text{m}$  to create a three dimensional volume.

282 Two configurations were considered to assess the impact of mitochondria: one in which the  
283 interior of the modeled domain is a homogeneous material continuum and one in which the regions  
284 representing mitochondria were subtracted from the myofibrillar and cytoplasmic domain. The  
285 latter case was based on the assumption that the calcium buffering activity of mitochondria is  
286 negligible.

287 Ryanodine receptor (RyR) locations were determined algorithmically, using a spatial statistics  
288 method based on nearest neighbour distances of experimentally-derived RyR locations (*Rajagopal  
289 et al., 2015*). These distributions were determined from confocal images of left ventricular car-  
290 diomyocytes of a healthy adult male Wistar rat using multiple passes of a band-pass filter detector,  
291 following the technique described by *Soeller and Cannell (2002)*. The method also limits the admis-  
292 sible locations of RyR clusters to segmented regions bordering myofibrils, mitochondria, and the  
293 sarcolemma (i.e., RyR clusters were not placed inside these organelles).

294 To evaluate the influence of spacing on the RyR cluster detection performance of CaCLEAN,  
295 two sets of constraints on the RyR distributions were considered: (1) RyR clusters were assigned  
296 following *Rajagopal et al. (2015)*, with locations based directly on statistical analysis of experimental  
297 data and with the total number of RyR clusters  $N=123$  per z-disk (984 total); (2) a minimal distance  
298 constraint of 1  $\mu\text{m}$  between RyR cluster centers was enforced and the total number of clusters was  
299 reduced to  $N=51$  per z-disk (408 total) to allow for this constraint. Eight unique cluster distribu-  
300 tions were generated for each case and were spaced 2  $\mu\text{m}$  apart along the extruded axis model  
301 volume to represent z-disk RyR populations. Linear tetrahedral meshes were constructed on these  
302 domains, consisting of: (1) 1436943 nodes, 8222684 elements; and (2) 1318942 nodes, 7504655  
303 elements respectively. These meshes included increased refinement in the regions containing and  
304 surrounding the modeled RyR locations.

305 Spherical regions 100 nm in radius were defined around nodes nearest to the determined  
306 location for each RyR cluster. Nodes lying within this sphere were prescribed density amplitudes  
307 exponentially decreasing as a function of the square of their radial position from the central node.  
308 RyR cluster release times were sampled from an exponential distribution with a characteristic decay  
309 constant of 6.7 ms, following the findings of *Wang et al. (2001)*.

310 Further details on the reaction diffusion equations for the buffers modeled and the ordinary  
311 differential equation model describing release of  $\text{Ca}^{2+}$  from RyR clusters have been previously  
312 reported (*Rajagopal et al., 2015*).

### 313 **Simulation of confocal fluorescence signals from FE model results**

314 To simulate confocal fluorescence results, the irregularly distributed node-based fluorescence-  
315 bound  $\text{Ca}^{2+}$  field from the FE model was first interpolated onto a regular grid at a resolution of  
316 53.75 nm in each direction. The data was temporally sampled at 5 ms intervals over the simulated  
317 time period of 30 ms, producing simulated imaging data for 7 timesteps. Nodal positions within  
318 mitochondria in the 'with mitochondria' permutations were ascribed the initial and background  
319 value  $\text{FCa} = 2.08$ . Discrete natural neighbor (Sibson) interpolation (*Park et al., 2006*) was chosen for  
320 this task on the basis that it can be used to generate regularly-spaced three-dimensional data, scales  
321 well for large datasets, and does not require additional parameterisation. The implementation used  
322 was version 1.7 of the naturalneighbor python package, available from the Python Package Index  
323 under the MIT license.

324 A point spread function (PSF) was generated as a normalised function of a multivariate Gaussian  
325 distribution applied in three dimensions (see *Figure 2B*). These distributions had a full width at  
326 half maximum (FWHM) of 410 nm in x and y and 1800 nm in z (where the z-axis represents the  
327 through-imaging-plane direction, shown as 'y' in *Figure 2B*). These values were based on reported

328 estimates of the dimensions of a PSF from a Visitech confocal microscope (*Plumb et al., 2015*). The  
329 resolution of the PSF image was chosen to be the same as the interpolated model data (53.75 nm  
330 in each direction).

331 The interpolated model imaging data was then convolved with the PSF in three dimensions  
332 using the SciPy convolve algorithm from the signal processing module. The resulting grid was then  
333 downsampled to a pixel resolution of 215 nm, following the resolution of the original CaCLEAN  
334 paper (*Tian et al., 2017*). Light noise (SNR = 100) was also added to the image data. Representative  
335 slices were sampled along the y-axis of the FE model, producing 22 two-dimensional simulated  
336 microscopy images for each of the four reported model permutations.

### 337 **Application of CaCLEAN to simulated fluorescence data**

338 The CaCLEAN algorithm was obtained from the author's GitHub repository: [https://github.com/  
339 qhtian/CaCLEAN](https://github.com/qhtian/CaCLEAN). The Matlab-based scripts were run using Matlab version R2017b. The function  
340 CICRcleanSimp was used to generate the CaCLEAN release map and the function CRUProps was  
341 used to segment the release map into individual calcium release units (CRUs).

### 342 **Classifying and quantifying performance of CaCLEAN**

343 A statistical classification approach was used to assess the performance of RyR cluster detection  
344 using CaCLEAN. Modeled cluster centers within the admissible window were considered the actual /  
345 ground truth class: TP (ground truth). CaCLEAN detection results were considered the predicted  
346 class. Detected RyR cluster sites were defined as determined by the CaCLEAN CRUProps function,  
347 which segments cluster regions using Matlab's built-in watershed algorithm and identifies centroids  
348 of segmented regions.

349 For each modeled cluster location, a TP (detected) classification was assigned if a TP (ground  
350 truth) cluster center lied within an available segmented CaCLEAN cluster region (or within a 1 pixel  
351 tolerance). When more than one TP (ground truth) fell within a CaCLEAN-detected cluster region,  
352 the detected cluster with the nearest centroid to the TP (ground truth) location was marked TP  
353 (detected). After classification as TP (detected), the associated CaCLEAN-detected site would be  
354 removed from the list of available matches. After iterating through the TP (ground truth) clusters,  
355 remaining TP (ground truth) unmatched with detected clusters were classified as false negatives  
356 (FN). Remaining CaCLEAN-detected sites unmatched with TP (ground truth) were classified as false  
357 positives (FP).

358 Two statistical measures were considered: recall and precision. Recall (also known as sensitivity,  
359 hit rate, or true positive rate) was defined such that

$$\text{Recall} = \frac{\text{TP (detected)}}{\text{TP (ground truth)}}. \quad (1)$$

360 Recall therefore gives the fraction of actual modeled clusters within an admissible window that  
361 were correctly detected by CaCLEAN. Precision (also known as positive predictive value) was defined  
362 such that

$$\text{Precision} = \frac{\text{TP (detected)}}{\text{TP (detected)} + \text{FP (detected)}}. \quad (2)$$

363 Precision therefore identifies the fraction of the detected clusters within an admissible window that  
364 were correct (not false positives). In both cases, higher values indicate better performance.

365 The above definition of recall may be considered "cumulative recall", identifying the detection  
366 fraction of all clusters within a given admissible window. To determine the detection fraction of  
367 clusters at a given z distance from the simulated imaging plane, we also defined an alternative  
368 "differential recall" such that

$$\text{Differential Recall} = \frac{d(\text{TP (detected)})}{d(\text{TP (ground truth)})}. \quad (3)$$

369 This measured the fraction of modeled clusters detected by CaCLEAN in 10 nm spaced bands above  
370 and below the imaging plane. Only bands with at least one TP (ground truth) were considered.  
371 Mean values for this detection fraction were acquired over the 22 simulated imaging planes. A  
372 Savitzky-Golay filter (polynomial order 3, frame length 21) was then applied to smooth the results  
373 as shown in *Figure Supplement 1*. Single-term Gaussian fits were also applied to identify trends in  
374 the resulting curves, as shown in *Figure 7*.

## 375 Acknowledgments

376 This research was supported in part by the Australian Government through the Australian Re-  
377 search Council's Discovery Projects funding scheme (project DP170101358), and in part by the  
378 Australian Research Council Centre of Excellence in Convergent Bio-Nano Science and Technology  
379 (project number CE140100036). HLR wishes to acknowledge financial support from the Research  
380 Foundation Flanders (FWO) (Project Grant G08861N and Odysseus programme Grant 90663). CS  
381 acknowledges financial support by the Engineering and Physical Sciences Research Council of the  
382 United Kingdom (Grant EP/N008235/1) and Biotechnology and Biological Sciences Research Council  
383 Grants BB/P026508/1 and BB/R022127/1.

## 384 References

- 385 **Bers DM.** Cardiac excitation–contraction coupling. *Nature*. 2002 Jan; 415:198–205. [http://www.nature.com/](http://www.nature.com/articles/415198a)  
386 [articles/415198a](http://www.nature.com/articles/415198a), doi: 10.1038/415198a.
- 387 **Dan P, Lin E, Huang J, Biln P, Tibbits GF.** Three-Dimensional Distribution of Cardiac Na<sup>+</sup>-Ca<sup>2+</sup> Exchanger and  
388 Ryanodine Receptor during Development. *Biophysical Journal*. 2007 Oct; 93(7):2504–2518. [http://www.](http://www.sciencedirect.com/science/article/pii/S0006349507715059)  
389 [sciencedirect.com/science/article/pii/S0006349507715059](http://www.sciencedirect.com/science/article/pii/S0006349507715059), doi: 10.1529/biophysj.107.104943.
- 390 **Hiess F, Detampel P, Nolla-Colomer C, Vallmitjana A, Ganguly A, Amrein M, ter Keurs HEDJ, Benítez R, Hove-**  
391 **Madsen L, Chen SRW.** Dynamic and Irregular Distribution of RyR2 Clusters in the Periphery of Live Ventricular  
392 Myocytes. *Biophysical Journal*. 2018 Jan; 114(2):343–354. [http://www.sciencedirect.com/science/article/pii/](http://www.sciencedirect.com/science/article/pii/S0006349517312584)  
393 [S0006349517312584](http://www.sciencedirect.com/science/article/pii/S0006349517312584), doi: 10.1016/j.bpj.2017.11.026.
- 394 **Hou Y, Jayasinghe I, Crossman DJ, Baddeley D, Soeller C.** Nanoscale analysis of ryanodine receptor clusters in  
395 dyadic couplings of rat cardiac myocytes. *Journal of Molecular and Cellular Cardiology*. 2015 Mar; 80:45–55.  
396 <http://www.sciencedirect.com/science/article/pii/S0022282814004258>, doi: 10.1016/j.yjmcc.2014.12.013.
- 397 **Högbom JA.** Aperture Synthesis with a Non-Regular Distribution of Interferometer Baselines. *Astronomy and*  
398 *Astrophysics Supplement Series*. 1974 Jun; 15:417. <http://cdsads.u-strasbg.fr/abs/1974A%26AS...15..417H>.
- 399 **Park SW, Linsen L, Kreylos O, Owens JD, Hamann B.** Discrete Sibson Interpolation. *IEEE Transactions on*  
400 *Visualization and Computer Graphics*. 2006 Mar; 12(2):243–253. <http://dx.doi.org/10.1109/TVCG.2006.27>, doi:  
401 [10.1109/TVCG.2006.27](http://dx.doi.org/10.1109/TVCG.2006.27).
- 402 **Plumb K, Elaz S, Pelletier V, Kilfoil ML.** Automated three-dimensional single cell phenotyping of spindle dy-  
403 namics, cell shape, and volume. arXiv:150400714 [physics]. 2015 Apr; <http://arxiv.org/abs/1504.00714>, arXiv:  
404 [1504.00714](http://arxiv.org/abs/1504.00714).
- 405 **Rajagopal V, Bass G, Walker CG, Crossman DJ, Petzer A, Hickey A, Siekmann I, Hoshijima M, Ellisman MH,**  
406 **Crampin EJ, Soeller C.** Examination of the Effects of Heterogeneous Organization of RyR Clusters, Myofib-  
407 rils and Mitochondria on Ca<sup>2+</sup> Release Patterns in Cardiomyocytes. *PLOS Computational Biology*. 2015  
408 Mar; 11(9):e1004417. <http://journals.plos.org/ploscompbiol/article?id=10.1371/journal.pcbi.1004417>, doi:  
409 [10.1371/journal.pcbi.1004417](http://journals.plos.org/ploscompbiol/article?id=10.1371/journal.pcbi.1004417).
- 410 **Soeller C, Cannell MB.** Estimation of the Sarcoplasmic Reticulum Ca<sup>2+</sup> Release Flux Underlying Ca<sup>2+</sup>  
411 Sparks. *Biophysical Journal*. 2002 May; 82(5):2396–2414. [http://www.sciencedirect.com/science/article/](http://www.sciencedirect.com/science/article/pii/S0006349502755847)  
412 [pii/S0006349502755847](http://www.sciencedirect.com/science/article/pii/S0006349502755847), doi: 10.1016/S0006-3495(02)75584-7.
- 413 **Soeller C, Crossman D, Gilbert R, Cannell MB.** Analysis of ryanodine receptor clusters in rat and human  
414 cardiac myocytes. *Proceedings of the National Academy of Sciences*. 2007 Sep; 104(38):14958–14963.  
415 <http://www.pnas.org/content/104/38/14958>, doi: 10.1073/pnas.0703016104.



- 416 **Tian Q**, Kaestner L, Schröder L, Guo J, Lipp P. An adaptation of astronomical image processing enables  
417 characterization and functional 3D mapping of individual sites of excitation-contraction coupling in rat cardiac  
418 muscle. *eLife*. 2017 Nov; 6:e30425. <https://elifesciences.org/articles/30425>, doi: 10.7554/eLife.30425.
- 419 **Wang SQ**, Song LS, Lakatta EG, Cheng H. Ca<sup>2+</sup> signalling between single L-type Ca<sup>2+</sup> channels and ryanodine  
420 receptors in heart cells. *Nature*. 2001 Mar; 410(6828):592–596. <http://www.nature.com/articles/35069083>,  
421 doi: 10.1038/35069083.
- 422 **Williams GSB**, Boyman L, Chikando AC, Khairallah RJ, Lederer WJ. Mitochondrial calcium uptake. *Proceedings of*  
423 *the National Academy of Sciences*. 2013 Jun; 110(26):10479–10486. [http://www.pnas.org/content/110/26/](http://www.pnas.org/content/110/26/10479)  
424 [10479](http://www.pnas.org/content/110/26/10479), doi: 10.1073/pnas.1300410110.

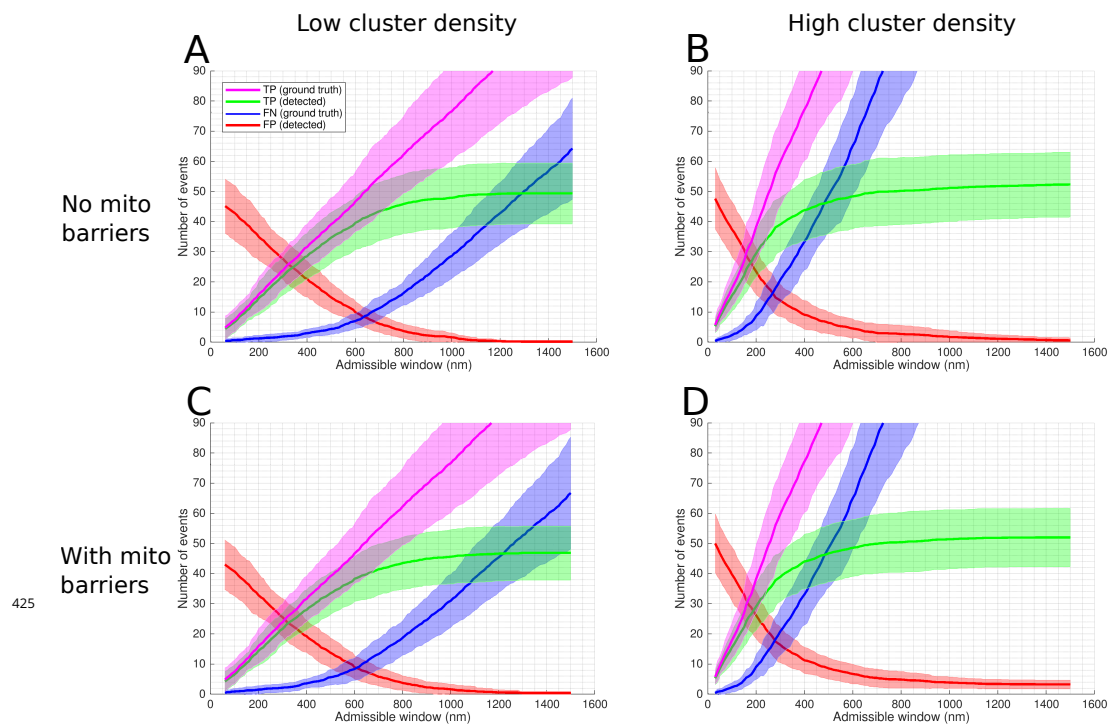

**Figure 4-Figure supplement 1. Statistical classifiers of CaCLEAN performance on simulated microscopy data in four model permutations.** Statistical classifiers for CaCLEAN results shown as a function of the size of the admissible window for each of the four model permutations. In each case, 22 images were simulated with equidistant spacing through the model volume. Shaded regions indicate one standard deviation of values within the group of 22 image slices. (A) A minimum spacing of  $1 \mu\text{m}$  is enforced between modeled clusters, no mitochondria present in the volume (resulting in a continuous domain across the mitochondrial regions). (B) Cluster spacing is determined by statistical analysis of RyR cluster distributions from immuno-labelled super-resolution microscopy data, no mitochondria present in the volume. (C) A minimum cluster spacing of  $1 \mu\text{m}$  is enforced between modeled clusters, mitochondrial regions are subtracted from the volume, acting as barriers to diffusion. (D) Cluster spacing is determined by statistical analysis of RyR cluster distributions from immuno-labelled super-resolution microscopy data, mitochondrial regions are subtracted from the volume, acting as barriers to diffusion.

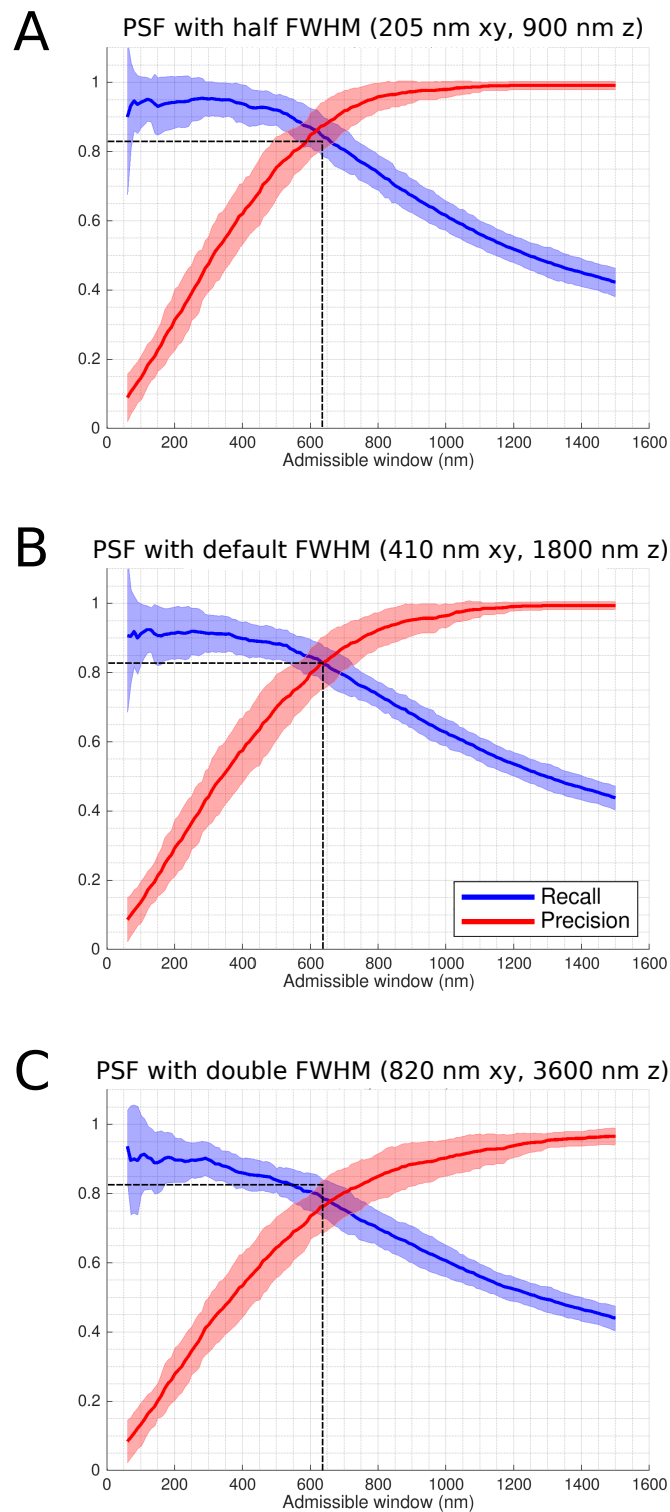

426

**Figure 5-Figure supplement 1. Recall and precision with alternative PSFs.** Recall and precision shown for the low cluster density, 1  $\mu\text{m}$  minimum spacing case (Figure 5A), with two alternate point spread functions (PSFs) shown in comparison to the default. The default PSF full width at half maximum (FWHM) dimensions of 410 nm in the image x-y plane and 1800 nm in the through-image z plane were based on published values using a Visitech confocal microscope (Plumb *et al.*, 2015). (A) Recall and precision with FWHM dimensions halved. (B) Results with the default settings. (C) Results with FWHM dimensions doubled. The default setting intersection point indicator dashed lines are left for visual reference.

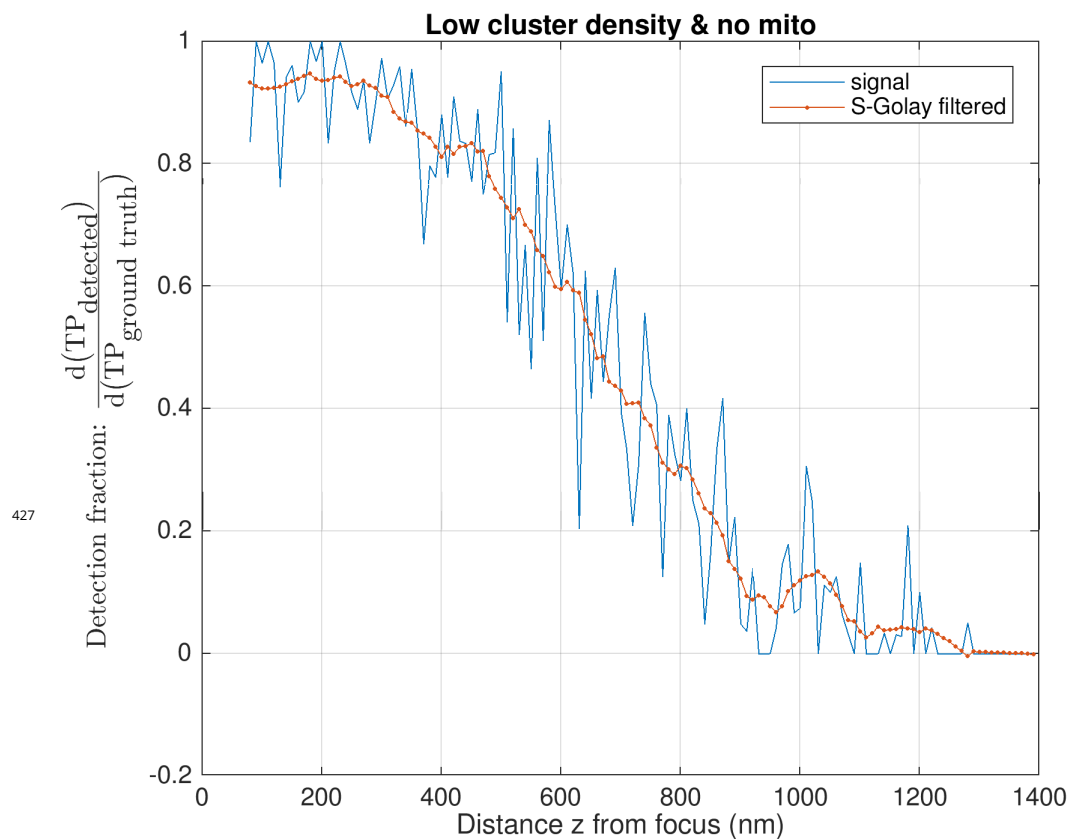

**Figure 7-Figure supplement 1. Smoothing filter applied to detection fraction data.** The true positive detection fraction results (shown here in blue) were smoothed using a Savitzky-Golay filter (polynomial order 3, frame length 21, results shown in red). The example data shown here is from the low density, no mitochondria case, with the filtered results here corresponding with the magenta data points in **Figure 7**.
